# Supplementary material for: Novel Mn4+-Activated K2Nb1−xMoxF7 (0 ≤ x ≤ 0.15) Solid Solution Red Phosphors with Superior Moisture Resistance and Good Thermal Stability
Source: MDPI journal article supplement (doi:10.3390/molecules28114566), 2023-06-05
Supplement: s1 [file s1]

## Supplementary Materials

# Novel Mn<sup>4+</sup>-Activated K<sub>2</sub>Nb<sub>1-x</sub>Mo<sub>x</sub>F<sub>7</sub> (0 ≤ x ≤ 0.15) Solid Solution Red Phosphors with Superior Moisture Resistance and Good Thermal Stability

Yuhan Gao, Lei Feng, Linglin Wang, Jun Zheng, Feiyao Ren, Siyu Liu, Zhanlei Ning \*, Ting Zhou, Xiaochun Wu, Xin Lai and Daojiang Gao \*

College of Chemistry and Materials Science, Sichuan Normal University, Chengdu 610066, China;  
2020080608@stu.sicnu.edu.cn (Y.G.); 20201201055@stu.sicnu.edu.cn (L.F.);  
20221201058@stu.sicnu.edu.cn (L.W.); 2020080243@stu.sicnu.edu.cn (J.Z.); 2020080221@stu.sicnu.edu.cn (F.R.);  
2020080622@stu.sicnu.edu.cn (S.L.); ting\_zhou@sicnu.edu.cn (T.Z.); wuxiaochun@sicnu.edu.cn (X.W.);  
laixin1972@sicnu.edu.cn (X.L.)

\* Correspondence: zlning@sicnu.edu.cn (Z.N.); daojianggao@sicnu.edu.cn (D.G.)

## List of Figures

- Figure S1. XRD Rietveld refinement patterns of  $\text{K}_2\text{Nb}_{1-x}\text{Mo}_x\text{F}_7:\text{Mn}^{4+}$  samples. .... S4
- Figure S2. Diffuse reflection spectra of  $\text{K}_2\text{NbF}_7:\text{Mn}^{4+}$  (KNF) (a) and  $\text{K}_2\text{Nb}_{1-x}\text{Mo}_x\text{F}_7:\text{Mn}^{4+}$  with  $x = 0.05$  (KNMF) (c); band gaps of KNF (b) and KNMF (d). .... S5
- Figure S3. Quantum yields of  $\text{K}_2\text{NbF}_7:\text{Mn}^{4+}$  (KNF) (a) and  $\text{K}_2\text{Nb}_{1-x}\text{Mo}_x\text{F}_7:\text{Mn}^{4+}$  with  $x = 0.05$  (KNMF) (b). S6
- Figure S4. Schematic diagram of the preparation process for  $\text{K}_2\text{MnF}_6$  and  $\text{K}_2\text{Nb}_{1-x}\text{Mo}_x\text{F}_7:\text{Mn}^{4+}$  phosphors. S7

## List of Tables

Table S1. Fitting parameters of decay lifetimes for the  $\text{K}_2\text{Nb}_{1-x}\text{Mo}_x\text{F}_7$ :  $\text{Mn}^{4+}$  phosphors..... S9

**Figure S1.** XRD Rietveld refinement patterns of  $\text{K}_2\text{Nb}_{1-x}\text{Mo}_x\text{F}_7$ :  $\text{Mn}^{4+}$  samples.

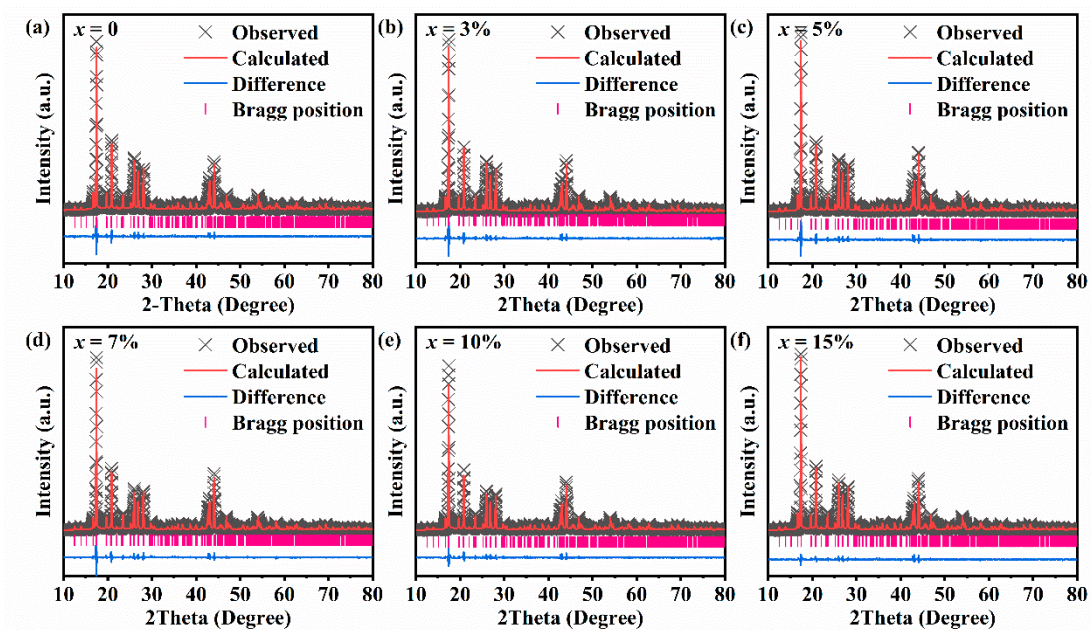

**Figure S2.** Diffuse reflection spectra of  $\text{K}_2\text{NbF}_7:\text{Mn}^{4+}$  (KNF) (a) and  $\text{K}_2\text{Nb}_{1-x}\text{Mo}_x\text{F}_7:\text{Mn}^{4+}$  with  $x = 0.05$  (KNMF) (c); band gaps of KNF (b) and KNMF (d).

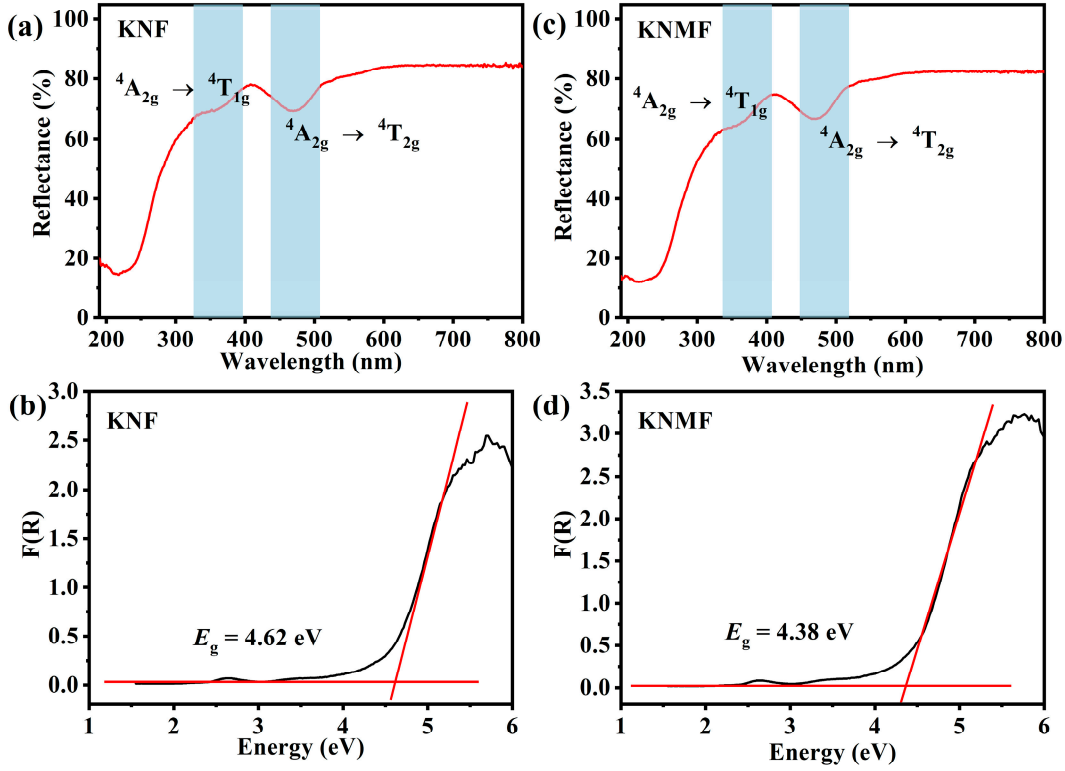

The Tauc relation and Kubelka-Munk relation were used to acquire the band gap from the diffuse reflection spectrum. The band gap can be calculated on the basis of the Tauc relation:

$$[F(R_{\infty}hv)]^n = A(hv - E_g) \quad (1)$$

where  $h\nu$ ,  $A$  and  $E_g$  are the energy of photon, proportional constant and the value of the band gap, respectively.  $n = 2$  or  $1/2$  correspond to a direct transition or indirect transition. And  $F(R_{\infty})$  is the Kubelka-Munk function, which is represented as follows:

$$F(R_{\infty}) = \frac{(1 - R)^2}{2R} = \frac{K}{S} \quad (2)$$

where  $R$  is the reflection,  $K$  is the absorption and  $S$  is the scattering coefficient [1]. From the linear extrapolation  $[F(R_{\infty}hv)]^2 = 0$  in Figure S 2b and d (see red lines), the  $E_g$  value for KNF and KNMF are estimated to be 4.62 eV and 4.38 eV, respectively. It is obvious that the  $E_g$  value distinctly decreased after the  $\text{Mo}^{6+}$  ions being doped into the  $\text{K}_2\text{NbF}_7:\text{Mn}^{4+}$  phosphor.

**Figure S3.** Quantum yields of  $\text{K}_2\text{NbF}_7:\text{Mn}^{4+}$  (KNF) (a) and  $\text{K}_2\text{Nb}_{1-x}\text{Mo}_x\text{F}_7:\text{Mn}^{4+}$  with  $x = 0.05$  (KNMF) (b).

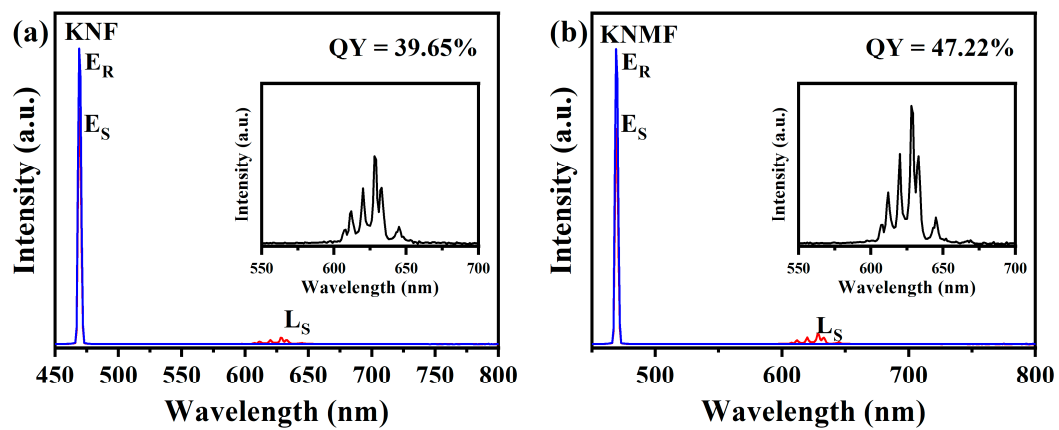

**Figure S4.** Schematic diagram of the preparation process for  $\text{K}_2\text{MnF}_6$  and  $\text{K}_2\text{Nb}_{1-x}\text{Mo}_x\text{F}_7:\text{Mn}^{4+}$  phosphors.

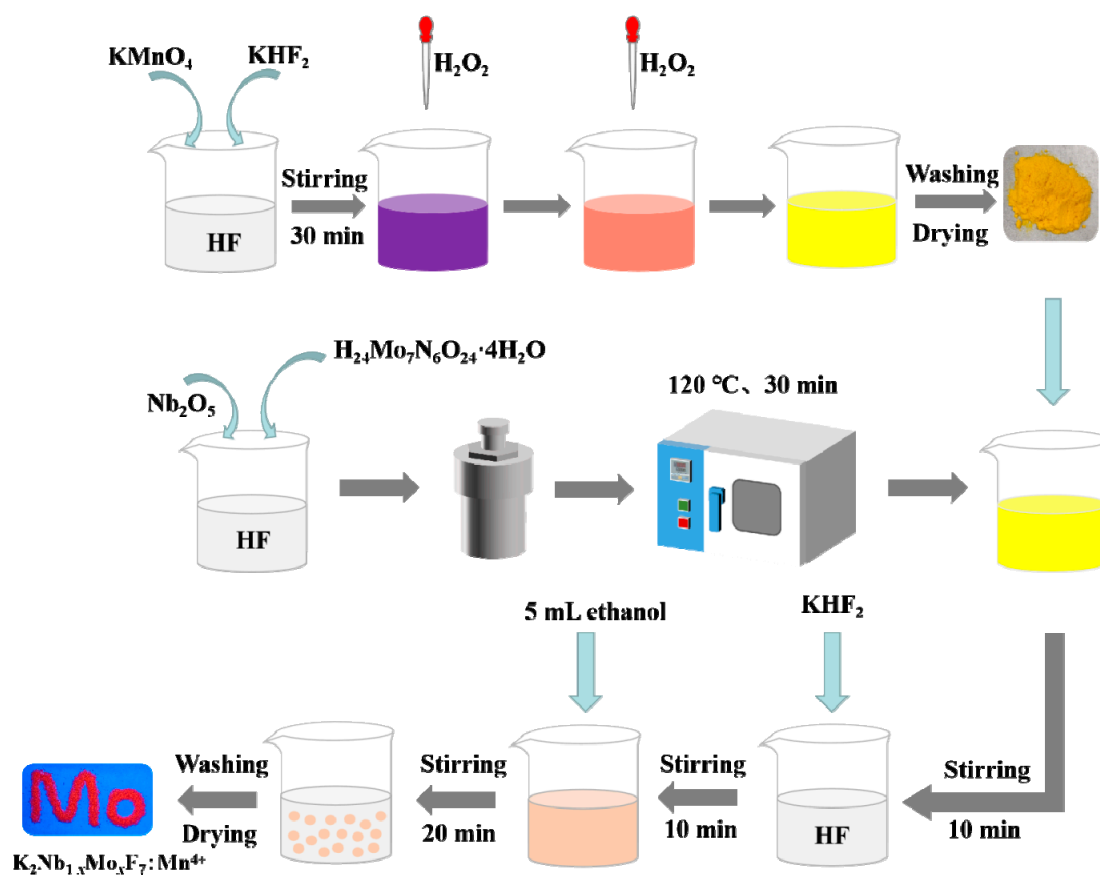

### Calculation of the color purity and CCT:

Based on the corresponding chroma coordinates, the relative color temperature and color purity of  $K_2Nb_{1-x}Mo_xF_7:Mn^{4+}$  phosphors are calculated by formula (3), (4) and (5), respectively.  $(x_d, y_d)$  is the coordinate of the dominant wavelength at 636 nm, and  $(x_i, y_i)$  is the coordinate of the CIE 1931 standard source,  $(x_e = 0.332, y_e = 0.186)$  expresses the epicenter of convergence [2].

$$\text{Color purity} = \frac{\sqrt{(x_s - x_i)^2 + (y_s - y_i)^2}}{\sqrt{(x_d - x_i)^2 + (y_d - y_i)^2}} \times 100\% \quad (3)$$

$$\text{CCT} = -4493n^3 + 3525n^2 - 6823.3n + 5520.33 \quad (4)$$

$$n = \frac{(x - x_e)}{(y - y_e)} \quad (5)$$

### Calculation of the activation energy $E_a$ :

The activation energy  $E_a$  is estimated using the Arrhenius formula below:

$$I_T = I_0 / [1 + c \cdot \exp(-E_a / kT)] \quad (6)$$

The formula can be simplified to the following logarithmic equation:

$$\ln[(I_0 / I_T) - 1] = -E_a / kT \quad (7)$$

where  $I_0$  and  $I_T$  is the emission intensity at initial and T temperature, respectively, and k is the Boltzman constant.



**Table S1.** Fitting parameters of decay lifetimes for the  $\text{K}_2\text{Nb}_{1-x}\text{Mo}_x\text{F}_7$ :  $\text{Mn}^{4+}$  phosphors.

| Samples    | $A_1$  | $\tau_1$ (ms) | $A_2$  | $\tau_2$ (ms) | $\tau$ (ms) | Adj. R-Square |
|------------|--------|---------------|--------|---------------|-------------|---------------|
| $x = 0$    | 1.3262 | 1.5325        | 1.6873 | 3.7239        | 3.1883      | 0.99341       |
| $x = 5\%$  | 2.1432 | 0.1499        | 1.984  | 3.6404        | 3.4917      | 0.99353       |
| $x = 15\%$ | 8.3017 | 0.9335        | 1.7791 | 3.6092        | 2.1459      | 0.99336       |

## References

- [1] Jansen, T.; Baur, F.; Jüstel, T., Red emitting  $\text{K}_2\text{NbF}_7\text{:Mn}^{4+}$  and  $\text{K}_2\text{TaF}_7\text{:Mn}^{4+}$  for warm-white LED applications. *Journal of Luminescence* **2017**, 192, 644-652.
- [2] Hong, F.; Pang, G.; Diao, L.; Fu, Z.; Liu, G.; Dong, X.; Yu, W.; Wang, J., Local structure modulation of  $\text{Mn}^{4+}$ -doped  $\text{Na}_2\text{Si}_{1-y}\text{Ge}_y\text{F}_6$  red phosphors for enhancement of emission intensity, moisture resistance, thermal stability and application in warm pc-WLEDs. *Dalton transactions* **2020**, 49, (39), 13805-13817.
